# Supplementary material for: Addition of Olive Leaf Extract to a Mixture of Algae and Extra Virgin Olive Oils Decreases Fatty Acid Oxidation and Synergically Attenuates Age-Induced Hypertension, Sarcopenia and Insulin Resistance in Rats
Source: MDPI journal article supplement (doi:10.3390/antiox10071066), 2021-07-01
Supplement: s1 [file s1]

# Addition of olive leaf extract to a mixture of algae and extra virgin olive oils decreases fatty acid oxidation and synergically attenuates age-induced hypertension, sarcopenia and insulin resistance in rats

Daniel González-Hedström <sup>1,2</sup>, María de la Fuente-Fernández <sup>1</sup>, Teresa Priego <sup>3</sup>, Ana Isabel Martín <sup>3</sup>, Sara Amor <sup>1</sup>, Asunción López-Calderón <sup>3</sup>, Antonio Manuel Inarejos-García <sup>2</sup>, Ángel Luís García-Villalón <sup>1</sup> and Miriam Granado <sup>1,4,\*</sup>

<sup>1</sup> Departamento de Fisiología, Facultad de Medicina, Universidad Autónoma de Madrid, 28029 Madrid, Spain; dgonzalez@pharmactive.eu (D.G.-H.); maria.delafuente@uam.es (M.F.-F.); sara.amor@uam.es (S.A.); angeluis.villalon@uam.es (A.L.G.-V.); miriam.granado@uam.es (M.G.)

<sup>2</sup> Pharmactive Biotech Products S.L. Parque Científico de Madrid. Avenida del Doctor Severo Ochoa, 37 Local 4J, 28049 Alcobendas, Madrid; dgonzalez@pharmactive.eu (D.G.-H.); aminarejos@hotmail.com (A.M.I.-G.).

<sup>3</sup> Departamento de Fisiología, Facultad de Medicina, Universidad Complutense de Madrid, Madrid, Spain; tpriegoc@med.ucm.es (T.P.); anabelmartin@med.ucm.es (A.I.M.); alc@med.ucm.es (A.L.-C.).

<sup>4</sup> CIBER Fisiopatología de la Obesidad y Nutrición. Instituto de Salud Carlos III, 28029 Madrid, Spain; miriam.granado@uam.es (M.G.)

\* Correspondence: miriam.granado@uam.es (M.G.); Tel.: +34-914-976-974.

## Supplementary information

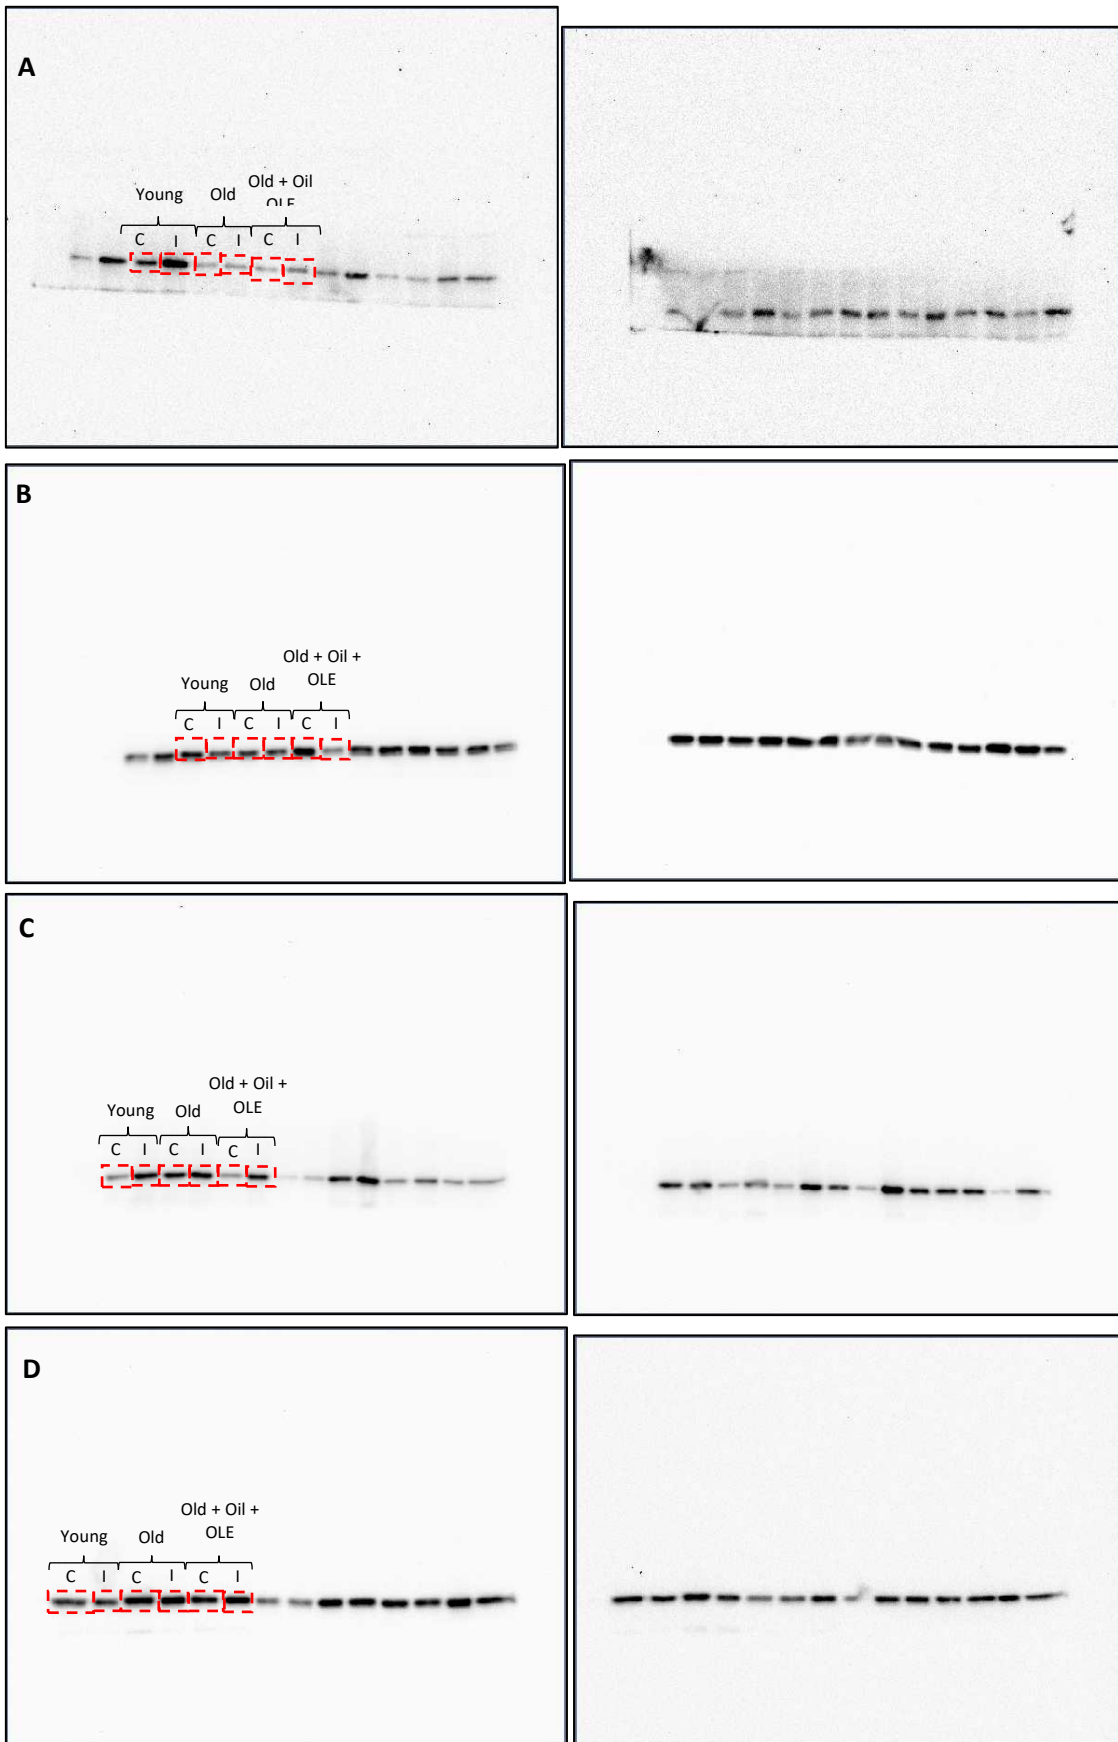

**Supplementary Figure 1.** Original and unprocessed blots of gastrocnemius p-Akt (**A**) and total Akt (**B**), and epididimal white adipose tissue p-Akt (**C**) and total Akt (**D**) western blots analysis from Figure 3A and B. *Showed blots at Figure 3A and B are marked with red boxes. C = Control; I = Insulin; OLE = olive leaf extract.*
